# Incidence and Mortality of Acute Kidney Injury after Myocardial Infarction: A Comparison between KDIGO and RIFLE Criteria

Fernando B. Rodrigues<sup>1</sup>, Rosana G. Bruetto<sup>2</sup>, Ulysses S. Torres<sup>2</sup>, Ana P. Otaviano<sup>3</sup>, Dirce M. T. Zanetta<sup>4,5</sup>, Emmanuel A. Burdmann<sup>2,5\*</sup>

**1** Division of Emergency and Chest Pain Center, Hospital de Base, Sao Jose do Rio Preto Medical School, Sao Jose do Rio Preto, São Paulo, Brazil, **2** Division of Nephrology, Hospital de Base, Sao Jose do Rio Preto Medical School, Sao Jose do Rio Preto, São Paulo, Brazil, **3** Division of Cardiology, Hospital de Base, Sao Jose do Rio Preto Medical School, Sao Jose do Rio Preto, São Paulo, Brazil, **4** Public Health School, University of Sao Paulo, Sao Paulo, Sao Paulo, Brazil, **5** Division of Nephrology, University of Sao Paulo Medical School, Sao Paulo, São Paulo, Brazil

## Abstract

**Background:** Acute kidney injury (AKI) increases the risk of death after acute myocardial infarction (AMI). Recently, a new AKI definition was proposed by the Kidney Disease Improving Global Outcomes (KDIGO) organization. The aim of the current study was to compare the incidence and the early and late mortality of AKI diagnosed by RIFLE and KDIGO criteria in the first 7 days of hospitalization due to an AMI.

**Methods and Results:** In total, 1,050 AMI patients were prospectively studied. AKI defined by RIFLE and KDIGO occurred in 14.8% and 36.6% of patients, respectively. By applying multivariate Cox analysis, AKI was associated with an increased adjusted hazard ratio (AHR) for 30-day death of 3.51 (95% confidence interval [CI] 2.35–5.25,  $p < 0.001$ ) by RIFLE and 3.99 (CI 2.59–6.15,  $p < 0.001$ ) by KDIGO and with an AHR for 1-year mortality of 1.84 (CI 1.12–3.01,  $p = 0.016$ ) by RIFLE and 2.43 (CI 1.62–3.62,  $p < 0.001$ ) by KDIGO. The subgroup of patients diagnosed as non-AKI by RIFLE but as AKI by KDIGO criteria had also an increased AHR for death of 2.55 (1.52–4.28) at 30 days and 2.28 (CI 1.46–3.54) at 1 year ( $p < 0.001$ ).

**Conclusions:** KDIGO criteria detected substantially more AKI patients than RIFLE among AMI patients. Patients diagnosed as AKI by KDIGO but not RIFLE criteria had a significantly higher early and late mortality. In this study KDIGO criteria were more suitable for AKI diagnosis in AMI patients than RIFLE criteria.

**Citation:** Rodrigues FB, Bruetto RG, Torres US, Otaviano AP, Zanetta DMT, et al. (2013) Incidence and Mortality of Acute Kidney Injury after Myocardial Infarction: A Comparison between KDIGO and RIFLE Criteria. PLoS ONE 8(7): e69998. doi:10.1371/journal.pone.0069998

**Editor:** Antonio Abbate, Virginia Commonwealth University, United States of America

**Received:** April 2, 2013; **Accepted:** June 14, 2013; **Published:** July 23, 2013

**Copyright:** © 2013 Rodrigues et al. This is an open-access article distributed under the terms of the Creative Commons Attribution License, which permits unrestricted use, distribution, and reproduction in any medium, provided the original author and source are credited.

**Funding:** EAB is partially supported by grants from Conselho Nacional de Desenvolvimento Científico e Tecnológico (CNPq), Brazil. RGB received a master's degree grant from Coordenação de Aperfeiçoamento de Pessoal de Nível Superior (CAPES), Brazil (process 0076/2007). UST received a young investigator award (process 2008/57115-6) from Fundação de Amparo à Pesquisa do Estado de São Paulo (FAPESP), Brazil. The funders had no role in study design, data collection and analysis, decision to publish, or preparation of the manuscript.

**Competing Interests:** Co-author Emmanuel A. Burdmann is a PLOS ONE Editorial Board member. This does not alter the authors' adherence to all the PLOS ONE policies on sharing data and material.

\* E-mail: burdmann@usp.br

These authors contributed equally to this work.

## Introduction

Development of AKI has been consistently associated with a higher mortality rate in acute myocardial infarction (AMI) patients [1–10]. However, the lack of a uniform standardization for the diagnosis of AKI led to conflicting epidemiological data, troubling the advancement in the management of this important syndrome [11].

Three new classification systems were recently developed for diagnosing acute kidney injury (AKI). The first, Risk, Injury, Failure, Loss, and End-stage kidney disease (RIFLE) [12] was developed by the Acute Dialysis Quality Initiative group. RIFLE is graded in increasing levels of severity. The first level, Risk, is defined as an abrupt (within 1–7 days) and sustained (>24 h) serum creatinine (SCr) increase to  $\geq 1.5$  times the baseline SCr, a glomerular filtration rate (GFR) decrease >25%

from the baseline GFR, or a urine output <0.5 mL/kg/h for >6 h.

The second classification was developed by the Acute Kidney Injury Network (AKIN) [13]. It is also graded in increasing levels of severity (AKIN 1 to AKIN 3) and uses the concept of small changes in SCr over a short period of time. The first level, AKIN 1, is defined as a SCr increase  $\geq 0.3$  mg/dL or  $\geq 1.5$ -fold compared with the baseline in a time window of 48 h or a urine output <0.5 mL/kg/h for >6 h.

The third and latest classification was developed by the Kidney Disease: Improving Global Outcomes (KDIGO) Acute Kidney Injury Work Group for their freshly launched KDIGO Clinical Practice for Acute Kidney Injury [14]. This definition is a wider combination from RIFLE and AKIN criteria and defined AKI as an increase in SCr by  $\geq 0.3$  mg/dL within 48 hours or an increase in SCr to  $\geq 1.5$  times baseline, which is known or presumed to

**Table 1.** Serum creatinine criteria for defining and staging AKI\*.

| Stage                    | Criteria                                                                                                                    |
|--------------------------|-----------------------------------------------------------------------------------------------------------------------------|
| <b>RIFLE<sup>†</sup></b> |                                                                                                                             |
| Risk                     | SCr×1.5 versus baseline                                                                                                     |
| Injury                   | SCr×2 versus baseline                                                                                                       |
| Failure                  | SCr×3 versus baseline, or SCr≥4.0 mg/dL with an acute increase≥0.5 mg/dL                                                    |
| <b>KDIGO<sup>†</sup></b> |                                                                                                                             |
| 1                        | SCr increase 1.5–1.9 times baseline or ≥0.3 mg/dL (≥26.5 μmol/L)                                                            |
| 2                        | SCr increase 2.0–2.9 times baseline                                                                                         |
| 3                        | SCr increase 3.0 times baseline or increase in SCr to ≥4.0 mg/dL (≥353.6 μmol/L) or initiation of renal replacement therapy |

AKI, acute kidney injury; RIFLE, Risk, Injury, Failure, Loss, and End-stage kidney Disease; SCr, serum creatinine. KDIGO, Kidney Disease: Improving Global Outcomes. \*Modified from references [12], [14].

<sup>†</sup>Only the SCr criteria were used to diagnose and stage AKI and therefore glomerular filtration rate and urinary output criteria were omitted.  
doi:10.1371/journal.pone.0069998.t001

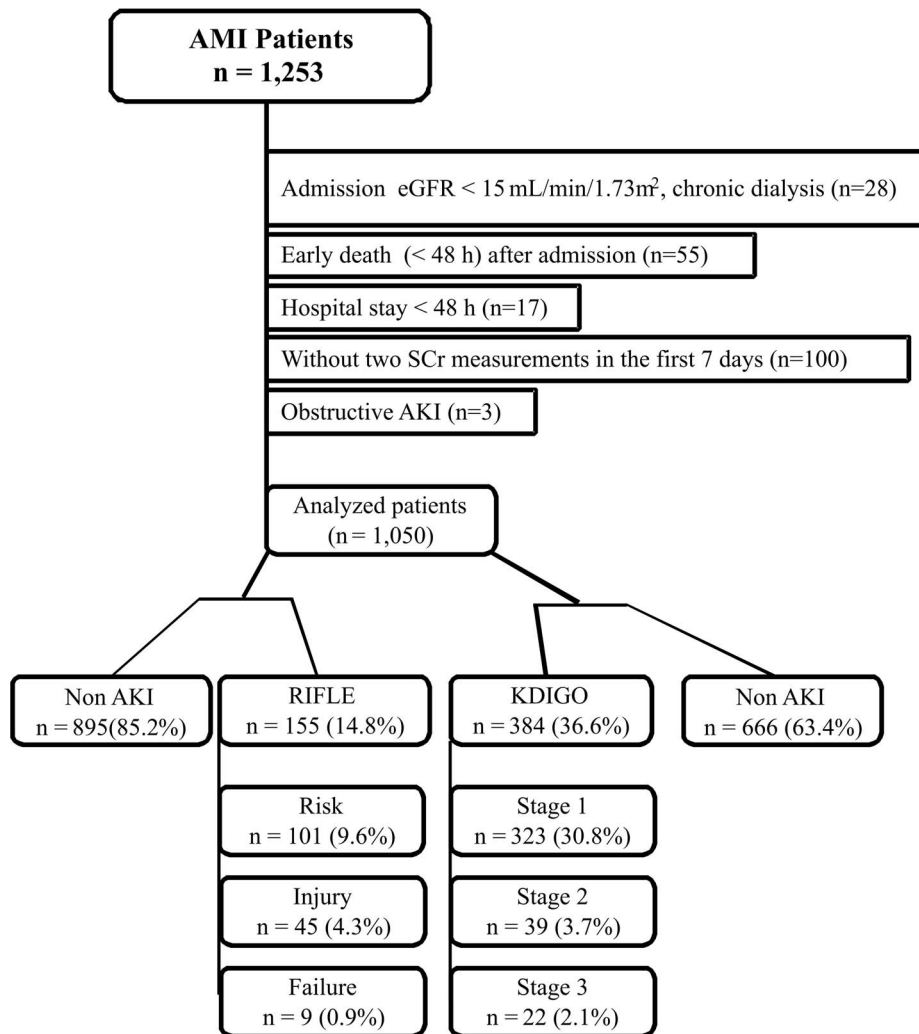

**Figure 1.** Flow chart showing the total cohort, excluded patients and stratification by AKI severity grade according to the AKI criteria used (KDIGO or RIFLE). AMI, acute myocardial infarction; SCr, serum creatinine; eGFR, estimated glomerular filtration rate; AKI, acute kidney injury; RIFLE, Risk, Injury, Failure, Loss, and End-stage kidney Disease; KDIGO, Kidney Disease: Improving Global Outcomes.  
doi:10.1371/journal.pone.0069998.g001

**Table 2.** Baseline clinical characteristics and medical therapy during hospitalization.

| Characteristics                              | (n = 1050 )    |
|----------------------------------------------|----------------|
| Age (y)                                      | 65 (55–74)*    |
| Male                                         | 674 (64.2%)    |
| White                                        | 969 (92.3%)    |
| Hypertension history                         | 730 (69.5%)    |
| Current smoking                              | 389 (37%)      |
| Diabetes history                             | 261 (24.9%)    |
| Hyperlipidemia history                       | 236 (22.5%)    |
| EVD history                                  | 80 (7.6%)      |
| Previous PCI <sup>†</sup>                    | 93 (8.9%)      |
| Previous CABG <sup>†</sup>                   | 88 (8.4%)      |
| Prior CAD (stenosis >50%) <sup>†</sup>       | 151 (14.4%)    |
| Previous infarction <sup>†</sup>             | 153 (14.6%)    |
| ACEs/ARBs prior use <sup>‡</sup>             | 443 (42.6%)    |
| STEMI                                        | 518 (49.3%)    |
| Killip classes II–IV <sup>§</sup>            | 87 (19.3%)     |
| Anterior wall infarction <sup>§</sup>        | 279 (53.9%)    |
| SBP < 100 mmHg <sup>†</sup>                  | 67 (6.4%)      |
| Weight (kg)                                  | 70 (62–80)*    |
| HR > 100 (beats/min)                         | 165 (15.7%)    |
| CK-MB (IU/L)                                 | 85 (39–187)*   |
| Admission SCr (mg/dL)                        | 1.2 (1.0–1.5)* |
| Admission eGFR (mL/min/1.73 m <sup>2</sup> ) | 61 (47–78.6)*  |
| Admission glycemia (mg/dL)                   | 123 (100–176)* |
| Medical therapy and invasive procedures      |                |
| Aspirin                                      | 1043 (99.3%)   |
| Clopidogrel                                  | 893 (85%)      |
| β-Blockers                                   | 985 (93.8%)    |
| ACEIs or ARBs                                | 1019 (97%)     |
| Statins                                      | 973 (92.7%)    |
| Coronary angiogram                           | 858 (81.7%)    |
| Any PCI <sup>  </sup>                        | 531 (50.6%)    |
| CABG                                         | 66 (6.3%)      |
| Reperfusion therapy <sup>§</sup>             |                |
| Primary PCI                                  | 270 (52.1%)    |
| Thrombolytics                                | 150 (29%)      |

Continuous variables are presented as the medians (with interquartile ranges), and categorical variables are presented as numbers and percentages. EVD, extracardiac vascular disease; PCI, percutaneous coronary intervention; CABG, coronary artery bypass graft; CAD, coronary artery disease; ACEIs, angiotensin-converting enzyme inhibitors; ARBs, angiotensin II receptor blockers; STEMI, ST-segment elevation myocardial infarction; SBP, systolic blood pressure; HR, heart rate; SCr, serum creatinine; eGFR, estimated glomerular filtration rate.

\*interquartile range,

<sup>†</sup>n = 1049;

<sup>‡</sup>n = 1040;

<sup>§</sup>n = 518 (STEMI patients);

<sup>||</sup>primary or non-primary.

doi:10.1371/journal.pone.0069998.t002

have occurred within the prior 7 days; or an urine volume <0.5 mL/kg/h for 6 hours. The combined use of small absolute and relative increases in SCr in the KDIGO criteria may potentially make it more sensitive than RIFLE criteria. The new

KDIGO criteria were not yet validated in AMI patients, and there are no data comparing AKI incidence and mortality defined by RIFLE and KDIGO after an AMI.

The aim of this study was to compare the incidence and the early (30-days) and late (1-year) mortality of AKI patients diagnosed by RIFLE and KDIGO criteria after ST-segment elevation myocardial infarction (STEMI) or non-ST-segment elevation myocardial infarction (NSTEMI).

## Methods

### Ethics Statement

This protocol was approved by the Institutional Ethics Committee (“Comitê de Ética em Pesquisa em Seres Humanos da Faculdade de Medicina de São José do Rio Preto”, São José do Rio Preto, Brazil, process 0040/2008), which agreed that informed consent was not necessary because of the purely observational nature of this study.

### Diagnostic Criteria for AKI

AKI was diagnosed and staged using the RIFLE and KDIGO SCr criteria (Table 1). GFR and urinary output criteria were not used for AKI diagnosis and staging in this study.

### Patients

This is a single center observational prospective cohort study. In total, 1,253 consecutive patients (October 2004 to December 2009) who were diagnosed as acute STEMI or NSTEMI [15] were assessed in a prospective database on thoracic pain. Patients were included if ≥18 years-old, hospitalization >48 h and had at least two SCr measurements in the first 7 days of hospitalization. Only the first hospital admission was considered if a patient had more than one hospitalization for AMI during the study period. Reasons for exclusion are shown in figure 1.

The final studied cohort was composed of 1,050 subjects assessed by RIFLE and KDIGO criteria (Figure 1).

### Creatinine Measurements and GFR Calculation

The Jaffé colorimetric method (ADVIATM 1650, Bayer, Germany) was used for the SCr measurements. The SCr was measured on hospital admission, daily during the intensive care unit stay and thereafter as needed.

The estimated GFR (eGFR) was calculated by the Modification of Diet in Renal Disease formula (MDRD) [16].

### Systolic Left Ventricular Function (LVF) Measurements

The systolic LVF (classified as normal, mild, moderate or severe dysfunction) [17] was assessed by echocardiography, as needed, in 85.7% (900) of the patients.

### Outcomes

The primary end point was death from any cause at 30 days and at the 1-year follow-up for those patients who survived after 30 days. Events occurring after one year were censored on day 365. The follow-up after discharge was obtained by reviewing electronic hospital system records, mail, or telephone contact.

### Statistical Analysis

The baseline characteristics (presented as medians with interquartile ranges) were compared via the t-test, Mann-Whitney test or Kruskal-Wallis test followed by the Dunn post-test for continuous variables. Categorical variables (presented as numbers

**Table 3.** Baseline clinical characteristics and medical therapy during hospitalization of AKI versus non-AKI patients according to the two AKI criteria used.

| Characteristics                     | KDIGO N = 1050 |                   |         | RIFLE N = 1050 |                   |         |
|-------------------------------------|----------------|-------------------|---------|----------------|-------------------|---------|
|                                     | AKI (n = 384)% | no AKI (n = 666)% | p-value | AKI (n = 155)% | no AKI (n = 895)% | p-value |
| Age >65 (y)                         | 62.2           | 45.2              | <0.001  | 65.2           | 40.1              | <0.001  |
| Male                                | 60.9           | 66.1              | 0.095   | 56.1           | 65.6              | 0.023   |
| HTN history                         | 76.6           | 65.5              | <0.001  | 78.1%          | 68                | 0.012   |
| Current smoking                     | 33.1           | 39.1              | 0.043   | 34.2           | 37.5              | 0.425   |
| Diabetes history                    | 33.3           | 20                | <0.001  | 37.4           | 22.7              | <0.001  |
| HCL history                         | 25.5           | 20.7              | 0.073   | 23.9           | 22.2              | 0.652   |
| EVD history                         | 11.5           | 5.4               | <0.001  | 10.3           | 7.2               | 0.169   |
| Prior CAD*                          | 15.9           | 13.5              | 0.296   | 14.8           | 14.3              | 0.865   |
| Previous infarction*                | 17.2           | 13.1              | 0.070   | 14.8           | 14.5              | 0.923   |
| Previous CABG*                      | 10.7           | 7.1               | 0.042   | 8.4            | 8.4               | 0.999   |
| ACEIs/ARBs prior use †              | 47.6           | 39.7              | 0.013   | 48.1           | 41.6              | 0.138   |
| STEMI‡                              | 52.9           | 47.3              | 0.082   | 53.5           | 48.6              | 0.256   |
| Killip classes II–IV‡               | 33             | 10.5              | <0.001  | 36.1           | 16.1              | <0.001  |
| Anterior wall‡                      | 31.1           | 24                | 0.013   | 32.9           | 25.5              | 0.054   |
| SBP <100 (mm Hg)                    | 8.3            | 5.3               | 0.050   | 13.5           | 5.1               | <0.001  |
| HR >100 (beats/min)                 | 20.6           | 12.9              | 0.001   | 25.2           | 14.1              | <0.001  |
| Admission SCr (mg/dL)               | 1.2 (1.0–1.7)  | 1.2 (1.0–1.4)     | <0.001  | 1.2 (0.9–1.6)  | 1.2 (1.0–1.5)     | 0.940   |
| eGFR <60 mL/min/1.73 m <sup>2</sup> | 53.1           | 45.9              | 0.025   | 52.3           | 47.9              | 0.320   |
| Aspirin                             | 98.7           | 99.7              | 0.107   | 96.8           | 99.8              | <0.001  |
| Clopidogrel                         | 81.5           | 87.1              | 0.015   | 75.5           | 86.7              | <0.001  |
| β-Blockers                          | 88.8           | 96.7              | <0.001  | 83.2           | 95.6              | <0.001  |
| ACEIs or ARBs                       | 94             | 98.5              | <0.001  | 91.6           | 98                | <0.001  |
| Diuretics                           | 77.9           | 44.1              | <0.001  | 78.7           | 52.6              | <0.001  |
| Coronary angiography                | 72.9           | 86.8              | <0.001  | 66.5           | 84.4              | <0.001  |
| Any PCI <sup>§</sup>                | 45.1           | 53.8              | 0.007   | 45.8           | 51.4              | 0.199   |
| CABG                                | 5.7            | 6.6               | 0.573   | 3.9            | 6.7               | 0.180   |
| Primary PCI‡                        | 42.9           | 58.1              | 0.001   | 46.3           | 53.7              | 0.221   |
| Any reperfusion <sup>  </sup>       | 75.9           | 83.8              | 0.025   | 70.7           | 83.3              | 0.007   |
| Severe LVD <sup>#</sup>             | 24.4           | 17.7              | 0.017   | 27.2           | 19                | 0.04    |

Continuous variables are presented as medians (with interquartile ranges), and categorical variables are presented as percentages. AKI, acute kidney injury; RIFLE, Risk, Injury, Failure, Loss, and End-stage kidney Disease; KDIGO, Kidney Disease: Improving Global Outcomes; HTN, hypertension; HCL, hypercholesterolemia; EVD, extracardiac vascular disease; CAD, coronary artery disease; CABG, coronary artery bypass graft; ACEIs, angiotensin-converting enzyme inhibitors; ARBs, angiotensin II receptor blockers; STEMI, ST-segment elevation myocardial infarction; SBP, systolic blood pressure; HR, heart rate; SCr, serum creatinine; eGFR, estimated glomerular filtration rate; PCI, percutaneous coronary intervention; LVD, left ventricular dysfunction.

\*n = 1049;

†n = 1040;

‡n = 518 (only for STEMI patients);

§Primary or non-primary;

||with PCI or thrombolytics;

#n = 9.

doi:10.1371/journal.pone.0069998.t003

and percentages) were compared by  $\chi^2$  statistics or Fisher's exact test.

Event-free survival curves were estimated by the Kaplan-Meier method, and the curves were compared with the log-rank test in univariate analyses. Multivariate Cox proportional hazards analyses were used to assess the relationship between AKI and mortality in the first 30 days and at the 1-year follow-up, adjusting for those variables with  $p < 0.15$  in the univariate analysis for mortality in each period and considered clinically important to be controlled. The proportional hazards test and the plotted cumulative survival estimate after the  $\ln(-\ln)$  transformation

suggested that the hazards of these variables were proportional for the period analyzed.

For Cox analyses at 30 days the model was adjusted for age (reference <65 years), gender (reference female), admission eGFR (reference  $\geq 60$  mL/min/1.73 m<sup>2</sup>), Killip class (reference  $\leq I$  at admission), systolic blood pressure (SBP) (reference  $\geq 100$  mmHg on admission), heart rate (HR) (reference  $\leq 100$  beats/min on admission), creatine phosphokinase (CPK-MB) and admission glycemia (continuous). The model was also adjusted for diabetes history, extracardiac vascular disease (EVD) history, clopidogrel use during hospitalization, use of diuretics, coronary angiography

**Table 4.** Univariate analyses for mortality at 30 days and 1-year and comparison between patients who developed and did not develop AKI according to the different AKI definitions.

| Definition, studied n             | Mortality      |                | p-value |
|-----------------------------------|----------------|----------------|---------|
|                                   | AKI            | No AKI         |         |
| <b>RIFLE</b>                      |                |                |         |
| 30 days (n = 1050)                | 38.1% (59/155) | 8.0% (72/895)  | <0.001  |
| 1 year* (n = 919)                 | 24% (23/96)    | 10.8% (89/823) | <0.001  |
| <b>KDIGO</b>                      |                |                |         |
| 30 days (n = 1050)                | 26% (100/384)  | 4.7% (31/666)  | <0.001  |
| 1 year* (n = 919)                 | 22.5% (68/336) | 7.6% (48/635)  | <0.001  |
| <b>AKI by KDIGO but not RIFLE</b> |                |                |         |
| 30 days (n = 895)                 | 17.9% (41/229) | 4.7% (31/666)  | <0.001  |
| 1 year* (n = 823)                 | 21.9% (41/187) | 7.5% (48/636)  | <0.001  |

AKI, acute kidney injury; RIFLE, Risk, Injury, Failure, Loss, and End-stage kidney Disease; KDIGO, Kidney Disease: Improving Global Outcomes.

\*1-year mortality was estimated for those patients who survived after 30 days. doi:10.1371/journal.pone.0069998.t004

during hospitalization, reperfusion therapy with primary percutaneous coronary intervention (PCI) for STEMI, any type of revascularization with either PCI or coronary artery bypass graft (CABG) performed during hospitalization, reinfarction and severe systolic left ventricular dysfunction (LVD). For these variables, the reference was their absence or presence.

The multivariate Cox analysis at 1-year included all patients who survived for 30 days after AMI, with censoring at 365 days. The controlling variables were the same as those included at mortality at 30 days evaluation, except for gender, SBP<100 mmHg, CPK-MB and reinfarction which did not meet the selection criteria ( $p>0.15$  in the univariate analysis) and for history of hypertension and prior use of angiotensin converting enzyme inhibitors (ACEIs) or angiotensin II receptor blockers (ARBs), which were also included ( $p<0.15$  in the univariate analysis).

Differences were considered statistically significant by a two-tailed  $p<0.05$  or based on a 95% confidence interval (CI). Analyses were performed with SPSS statistical software (version 15.0, Chicago, IL, USA).

## Results

### Study Population Characteristics

The clinical characteristics of the general population are shown in Table 2. The median for the hospitalization time was 7 (interquartile range: 4–12) days. Reinfarction occurred in 5.1% and dialysis was performed in 2.1% of the entire analyzed cohort. The in-hospital mortality rate was 13%.

The systolic LVEF was normal in 30.1%, mildly dysfunctional in 27.9%, moderately dysfunctional in 22% and severely dysfunctional in 20% of the patients who had this measurement done.

### Baseline Characteristics and Therapy during the Hospital Stay Comparing AKI to Non-AKI Patients According to the Two AKI Criteria used (Table 3)

Overall, independently of the AKI criteria used, the patients who developed AKI were older and more frequently had a history of hypertension and diabetes than non-AKI patients. A higher proportion of AKI patients were Killip class>I and had a HR >100 beat/min at admission than non-AKI subjects. AKI patients received less medical and reperfusion therapy and underwent less invasive procedures than non-AKI patients, but they received more diuretics, and a higher proportion had severe LVD. Patients who developed AKI according to KDIGO had a higher proportion of previous CABG, EVD, and prior use of ACEIs or ARBs than non-AKI patients.

### Comparative Incidence, Hospitalization Length and Mortality According to Each Criteria for AKI

Incidence and stratification by AKI severity are presented in Figure 1. The higher AKI incidence found by KDIGO (36.6%) compared with RIFLE (14.8%) was the result of the larger number of patients in KDIGO stage 1 compared with the RIFLE stage Risk (30.8% vs. 9.6%, respectively).

AKI patients diagnosed by RIFLE had a greater median length of hospital stay (8.4 [interquartile range: 3.6–16.5] days versus 7.5

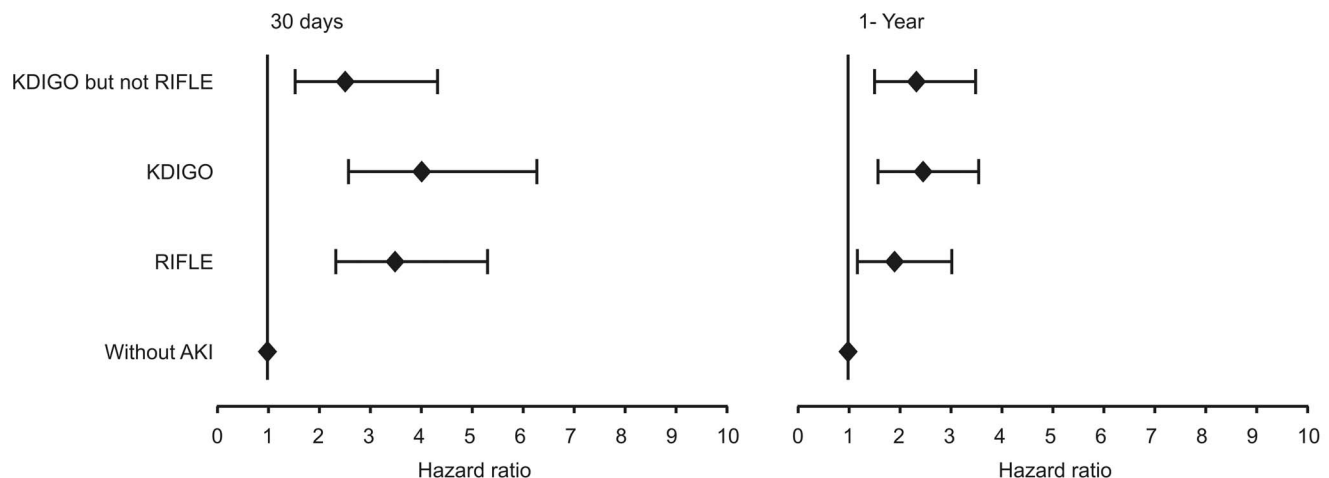

**Figure 2. Hazard ratio (Cox multivariate analysis) for death at 30 days and at 30-day to 1-year follow-up according to the different AKI criteria.** AKI, acute kidney injury; RIFLE, Risk, Injury, Failure, Loss, and End-stage kidney Disease; KDIGO, Kidney Disease: Improving Global Outcomes.

doi:10.1371/journal.pone.0069998.g002

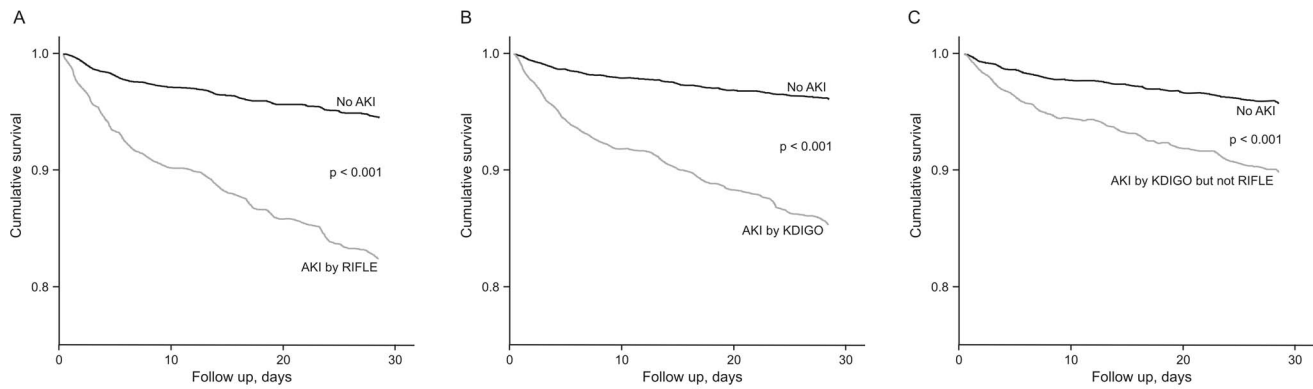

**Figure 3. Cox survival curve at 30 days according to the different AKI criteria.** A. RIFLE; B. KDIGO; C. KDIGO but not RIFLE. AKI, acute kidney injury; RIFLE, Risk, Injury, Failure, Loss, and End-stage kidney Disease; KDIGO, Kidney Disease: Improving Global Outcomes. doi:10.1371/journal.pone.0069998.g003

[interquartile range: 4.4–12.6] days,  $p < 0.001$ ) than patients without AKI. In the same way, patients diagnosed by KDIGO had greater median length of hospitalization (9.4 [interquartile range: 4.7–16.2] days versus 6.7 [interquartile range: 4.3–11.5] days,  $p < 0.001$ ) than subjects without AKI.

AKI patients diagnosed by any AKI criteria had a significantly higher 30-day and 30-days to 1-year mortality rates assessed by univariate analysis than subjects without AKI (Table 4).

#### Patients Diagnosed as AKI by KDIGO but not RIFLE Criteria

Two hundred twenty-nine patients (21.8% of the entire cohort) were diagnosed as AKI by KDIGO but not by RIFLE. These patients had a greater median length of hospital stay (9.5 [interquartile range: 5.4–16.0] days versus 6.7 [interquartile range: 4.3–11.5] days,  $p < 0.001$ ) than patients without AKI by both criteria.

These patients had also a higher 30-day and 30-day to 1-year mortality rates compared with patients who were non-AKI by both criteria (Table 4).

#### Cox Analyses at 30 days and at 30-day to 1-year

The development of AKI by RIFLE or KDIGO during hospitalization assessed by Cox analyses remained independently associated with mortality at 30 days and at 30-day to 1-year follow-up. Patients who were diagnosed as AKI by KDIGO but

not by RIFLE criteria also had a higher AHR ratio for early and late mortality compared with patients without AKI by any criteria (Tables 5 and 6; Figures 2, 3 and 4).

#### Discussion

In the best of our knowledge there are no previous data assessing and comparing AMI-associated AKI diagnosed by RIFLE and KDIGO criteria [18]. KDIGO had a higher detection rate for AKI than RIFLE criteria and was the most inclusive criteria. Importantly, patients who were diagnosed as AKI by KDIGO but were missed by RIFLE criteria had a significantly longer hospitalization and a significantly higher AHR for death, which has an obvious clinical implication.

#### Differences in the AKI Detection Rate by RIFLE Compared with KDIGO

KDIGO diagnosed more AKI than RIFLE during the first seven days of hospitalization. When compared with RIFLE the KDIGO definition diagnosed AKI in an additional 229/1,050 patients, who represented 21.8% of the entire analyzed cohort. If only RIFLE criteria were used, a significant number of patients would be misclassified as non AKI by RIFLE.

The previously reported incidence of AMI-associated AKI is extremely heterogeneous, ranging from 5 to 55% and varies with the criteria used for diagnosing AKI and the studied clinical setting [1–10,19,20]. These large disagreements in the incidence of AKI

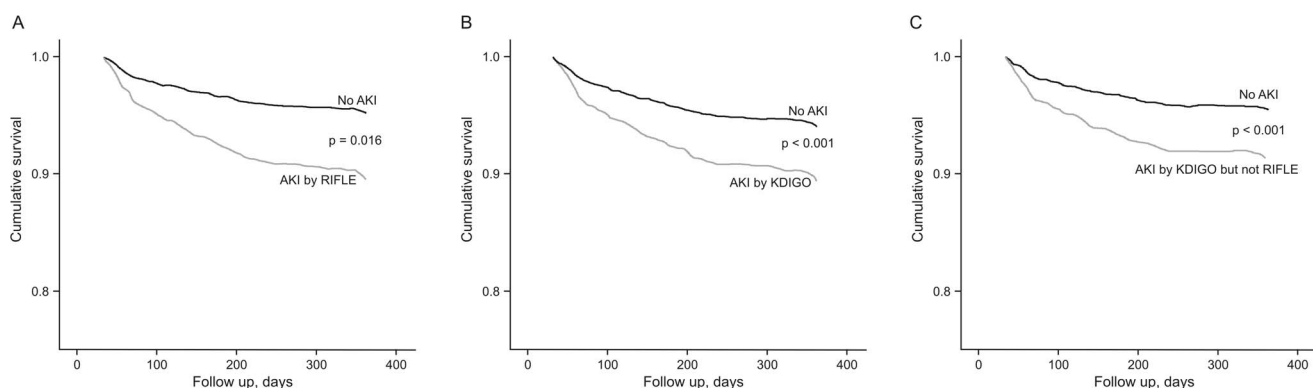

**Figure 4. Cox survival curve at 30-days to 1-year according to the different AKI criteria.** A. RIFLE; B. KDIGO; C. KDIGO but not RIFLE. AKI, acute kidney injury; RIFLE, Risk, Injury, Failure, Loss, and End-stage kidney Disease; KDIGO, Kidney Disease: Improving Global Outcomes. doi:10.1371/journal.pone.0069998.g004



**Table 5.** Cox proportional hazard models for the association between 30-day mortality and AKI according to the different AKI criteria used.

| Criteria for AKI      | AHR  | 95% CI    | p-value |
|-----------------------|------|-----------|---------|
| Patients without AKI* | 1.0  |           |         |
| RIFLE                 | 3.51 | 2.35–5.25 | <0.001  |
| KDIGO                 | 3.99 | 2.59–6.15 | <0.001  |
| KDIGO but not RIFLE   | 2.55 | 1.52–4.28 | <0.001  |

AKI, acute kidney injury; AHR, adjusted hazard ratio; CI, confidence interval; RIFLE, Risk, Injury, Failure, Loss, and End-stage kidney Disease; KDIGO, Kidney Disease: Improving Global Outcomes.

The model was adjusted for age, gender, admission estimated glomerular filtration rate, history of diabetes, history of extracardiac vascular disease, Killip class, admission systolic blood pressure, admission heart rate, admission creatine phosphokinase and glycemia, clopidogrel use during hospitalization, therapy with diuretics, coronary angiography during hospitalization, reperfusion therapy with primary percutaneous coronary intervention (PCI) for ST-segment elevation myocardial infarction, any kind of revascularization with either PCI or coronary artery bypass graft performed during hospitalization, reinfarction or severe systolic left ventricular dysfunction.

\*The AHR was estimated for each set of criteria with consideration of patients without AKI for each.

doi:10.1371/journal.pone.0069998.t005

among previous studies reflect the lack of standardization for diagnosing AKI and support the need for a defined and validated set of AKI criteria instead of arbitrary definitions.

In this study we have used only the SCr criteria for diagnosing and staging AKI by RIFLE definition, although the original criteria also used GFR decreases for AKI diagnosis and staging [12]. In fact, the use of GFR criteria calculated as 25% decrease for risk and as 75% decrease for failure stages has been questioned since in steady-state the 1.5-fold increase in SCr would correspond to a one-third decrease (instead of 25%) in GFR and the 3-fold increase in SCr would correspond to a two-thirds decrease (instead of 75%) in GFR [21]. Moreover, GFR is seldom measured in the context of AKI, but estimated by formulas using SCr measurements. Nevertheless, estimation of GFR by formulas is only valid when SCr is in equilibrium, which is not the case for AKI.

We also decided not to use the urinary output criteria, since they are less validated, may be influenced by several drugs used by this studied population and are very difficult to capture and measure reliably in the emergency room setting.

### Why is the AKI Detection Rate Higher with KDIGO than RIFLE?

The most relevant difference between KDIGO and RIFLE is related to the conditions necessary to classify a patient as KDIGO stage 1 or RIFLE stage Risk. Whereas a SCr increase of  $\geq 50\%$  from baseline is necessary in RIFLE, by the KDIGO definition, only an absolute SCr increase of 0.3 mg/dL ( $\geq 26.5 \mu\text{mol/L}$ ) within 48 hours is sufficient for an AKI diagnosis. The 0.3 mg/dL variation was included in the KDIGO definition because such small changes in SCr have been independently associated with death in AKI patients [22,23]. Small changes in SCr have also been associated with early and long-term mortality in cohorts of AMI patients [3,4].

A potential problem with the use of a moving 48 h window for AKI diagnosis, as recommended by KDIGO and AKIN definitions, is when SCr decreases in comparison with the pre-event value due to fluid accumulation with a subsequent increase of at least 0.3 mg/dL. In a study on AKI after cardiopulmonary

**Table 6.** Cox proportional hazard models for the association between 30-day to 1-year mortality and AKI according to the different AKI criteria used.

| Criteria for AKI      | AHR  | 95% CI    | p-value |
|-----------------------|------|-----------|---------|
| Patients without AKI* | 1.0  |           |         |
| RIFLE                 | 1.84 | 1.12–3.01 | 0.016   |
| KDIGO                 | 2.43 | 1.62–3.62 | <0.001  |
| KDIGO but not RIFLE   | 2.28 | 1.46–3.54 | <0.001  |

AKI, acute kidney injury; AHR, adjusted hazard ratio; CI, confidence interval; RIFLE, Risk, Injury, Failure, Loss, and End-stage kidney Disease; KDIGO, Kidney Disease: Improving Global Outcomes.

The model was adjusted for age, admission estimated glomerular filtration rate, history of hypertension and diabetes, history of extracardiac vascular disease, prior use of angiotensin-converting enzyme inhibitors or angiotensin II receptor blockers, admission Killip class, admission heart rate, admission glycemia, clopidogrel use during hospitalization, therapy with diuretics, coronary angiography during hospitalization, reperfusion therapy with primary percutaneous coronary intervention (PCI) for ST-segment elevation myocardial infarction, any type of revascularization with either PCI or coronary artery bypass graft performed during hospitalization or severe systolic left ventricular dysfunction.

\*The AHR was estimated for each set of criteria, considering patients without AKI for each.

doi:10.1371/journal.pone.0069998.t006

bypass the authors found significantly more patients diagnosed as AKI by AKIN (26.3%) than by RIFLE (18.9%) criteria ( $p < 0.0001$ ). Patients classified as AKI in one but not in the other definition set were predominantly staged in the lowest AKI severity class (9.6% of patients in AKIN stage 1 and 2.3% of patients in RIFLE class R). The authors determined that the differences between patients diagnosed as AKI by RIFLE or AKIN were mainly found in the subgroup that had an initial decrease of SCr from preoperative baseline to post-operative day 1, probably due to fluid accumulation during surgery. In this subgroup, post-operative SCr values that were lower than preoperative levels served as comparison in the 48-hour moving diagnostic window of AKIN [24]. That is not the case for the current study since patients after AMI are not massively hydrated as during cardiopulmonary bypass, and consequently the AMI patients assessed are certainly less affected by a dilution of the baseline SCr. Although our data are favorable for the use of the KDIGO criteria, the reference SCr possibly needs to be differently defined depending on the particular studied population, and in some circumstances the pre-event baseline SCr could be more reliable for AKI diagnosis than the moving 48 hour SCr window.

### Mortality

After controlling for the prognostic variables that might affect mortality after STEMI and NSTEMI, AKI diagnosed by both criteria remained independently associated with mortality at 30-days and 1-year follow-up.

The most important novel finding of the current study is that patients with an AKI diagnosis by KDIGO, but not by RIFLE, had a higher AHR for mortality when compared with non-AKI patients. These results indicate that a large number of patients with AMI-induced AKI and elevated risk for mortality would be missed by the RIFLE criteria.

### Study Limitations

This was an observational single-center prospective cohort study.

A possible study limitation is related to the time of the assessment of the reference SCr level. This limitation occurred due to difficulties to obtain reference SCr data prior to the event precipitating admission, as most patients have not undergone a previous renal function evaluation prior to their hospital entry for an acute illness as AMI. Various strategies for dealing with pre-event absent reference SCr have been highlighted, such as using lowest admission or discharge SCr against which to diagnose AKI [25]. In the current study we have chosen to use the admission SCr as the reference value used to diagnose AKI. As a result, it is possible that some patients who were hospitalized already had AKI, but because the SCr did not increase further, they were misclassified as non-AKI. In the same way, patients who present with renal dysfunction at admission and their SCr did not decrease after admission actually might have suffered an AKI just before the hospitalization. In fact, a recent study on cardiac arrest patients requiring resuscitation suggested that patients whose SCr

did not decrease after admission in that scenario, actually did have AKI [26].

## Conclusions

KDIGO had a higher detection rate for AKI than RIFLE. Patients misclassified as non-AKI by RIFLE had a higher AHR for death when compared with non-AKI subjects according to any definition. As a more inclusive criterion, KDIGO is probably more suitable for AKI diagnosis and risk stratification in patients with AMI.

## Author Contributions

Conceived and designed the experiments: FR EB. Performed the experiments: FR RB UT AO. Analyzed the data: FR DZ EB. Contributed reagents/materials/analysis tools: DZ EB. Wrote the paper: FR DZ EB.

## References

- Bruetto RG, Rodrigues FB, Torres US, Otaviano AP, Zanetta DMT, et al. (2012) Renal function at hospital admission and mortality due to acute kidney injury after myocardial infarction. *PLoS One* 7: e35496.
- Goldberg A, Hammerman H, Petcherski S, Zdoroviyak A, Yalonetsky S, et al. (2005) In-hospital and 1-year mortality of patients who develop worsening renal function following acute ST-elevation myocardial infarction. *Am Heart J* 150: 330–337.
- Newsome BB, Warnock DG, McClellan WM, Herzog CA, Kiefe CI, et al. (2008) Long-term risk of mortality and end-stage renal disease among the elderly after small increases in serum creatinine level during hospitalization for acute myocardial infarction. *Arch Intern Med* 168: 609–616.
- Parikh CR, Coca SG, Wang Y, Masoudi FA, Krumholz HM (2008) Long-term prognosis of acute kidney injury after acute myocardial infarction. *Arch Intern Med* 168: 987–995.
- Marenzi G, Assanelli E, Campodonico J, De Metrio M, Lauri G, et al. (2010) Acute kidney injury in ST-segment elevation acute myocardial infarction complicated by cardiogenic shock at admission. *Crit Care Med* 38: 438–444.
- Anzai A, Anzai T, Naito K, Kaneko H, Mano Y, et al. (2010) Prognostic significance of acute kidney injury after reperfused ST-elevation myocardial infarction: synergistic acceleration of renal dysfunction and left ventricular remodeling. *J Card Fail* 16: 381–389.
- Amin AP, Spertus JA, Reid KJ, Lan X, Buchanan DM, et al. (2010) The prognostic importance of worsening renal function during an acute myocardial infarction on long-term mortality. *Am Heart J* 160: 1065–1071.
- Lazaros G, Tsiachris D, Tousoulis D, Patialiakas A, Dimitriadis K, et al. (2012) In-hospital worsening renal function is an independent predictor of one-year mortality in patients with acute myocardial infarction. *Int J Cardiol* 155: 97–101.
- Jose P, Skali H, Anavekar N, Tomson C, Krumholz HM, et al. (2006) Increase in creatinine and cardiovascular risk in patients with systolic dysfunction after myocardial infarction. *J Am Soc Nephrol* 17: 2886–2891.
- Amin AP, Salisbury AC, McCullough PA, Gosch K, Spertus JA, et al. (2012) Trends in the incidence of acute kidney injury in patients hospitalized with acute myocardial infarction. *Arch Intern Med* 172: 246–53.
- Ostermann M, Chang RW (2011) Challenges of defining acute kidney injury. *QJM* 104: 237–243.
- Bellomo R, Ronco C, Kellum JA, Mehta RL, Palevsky P (2004) Acute renal failure - definition, outcome measures, animal models, fluid therapy and information technology needs: the Second International Consensus Conference of the Acute Dialysis Quality Initiative (ADQI) Group. *Crit Care* 8: R204–212.
- Mehta RL, Kellum JA, Shah SV, Molitoris BA, Ronco C, et al. (2007) Acute Kidney Injury Network: report of an initiative to improve outcomes in acute kidney injury. *Crit Care* 11: R31.
- Kidney Disease: Improving Global Outcomes (KDIGO) Acute Kidney Injury Work Group (2012) KDIGO Clinical Practice Guideline for Acute Kidney Injury. *Kidney Int (Suppl 1)*: 1–138.
- Thygesen K, Alpert JS, White HD, Jaffe AS, Apple FS, et al. (2007) Universal definition of myocardial infarction. *Circulation* 116: 2634–2653.
- Levey A, Bosch J, Lewis J, Greene T, Rogers N, et al. (1999) A more accurate method to estimate glomerular filtration rate from serum creatinine: a new prediction equation. Modification of Diet in Renal Disease Study Group. *Ann Intern Med* 130: 461–470.
- Cheitlin MD, Alpert JS, Armstrong WF, Aurigemma GP, Beller GA, et al. (1997) ACC/AHA guidelines for the clinical application of echocardiography: executive summary. A report of the American College of Cardiology/American Heart Association Task Force on practice guidelines (Committee on Clinical Application of Echocardiography). Developed in collaboration with the American Society of Echocardiography. *J Am Coll Cardiol* 29: 862–879.
- Rodrigues F, Bruetto R, Torres U, Otaviano A, Zanetta D, et al. (2010) Effect of kidney disease on acute coronary syndrome. *Clin J Am Soc Nephrol* 5: 1530–1536.
- Hwang SH, Jeong MH, Ahmed K, Kim MC, Cho KH, et al. (2011) Different clinical outcomes of acute kidney injury according to acute kidney injury network criteria in patients between ST elevation and non-ST elevation myocardial infarction. *Int J Cardiol* 15: 99–101.
- Mielniczuk LM, Pfeffer MA, Lewis EF, Blazing MA, de Lemos JA, et al. (2009) Acute decline in renal function, inflammation, and cardiovascular risk after an acute coronary syndrome. *Clin J Am Soc Nephrol* 4: 1811–1817.
- Pickering JW, Endre ZH (2009). GFR shot by RIFLE: errors in staging acute kidney injury. *Lancet* 373: 1318–1319.
- Lassnigg A, Schmidlin D, Mouhieddine M, Bachmann LM, Druml W, et al. (2004) Minimal changes of serum creatinine predict prognosis in patients after cardiothoracic surgery: a prospective cohort study. *J Am Soc Nephrol* 15: 1597–1605.
- Praught ML, Shlipak MG (2005) Are small changes in serum creatinine an important risk factor? *Curr Opin Nephrol Hypertens* 14: 265–270.
- Englberger L, Suri RM, Li Z, Casey ET, Daly RC et al. (2011) Clinical accuracy of RIFLE and Acute Kidney Injury Network (AKIN) criteria for acute kidney injury in patients undergoing cardiac surgery. *Crit Care* 15: R16.
- Endre ZH, Walker RJ, Pickering JW, Shaw GM, Frampton CM et al. (2010) Early intervention with erythropoietin does not affect the outcome of acute kidney injury (the EARLYARF trial). *Kidney International* 77: 1020–1030.
- Pickering JW, Ralib AM, Endre ZH (2013) Combining creatinine and volume kinetics identifies missed cases of acute kidney injury following cardiac arrest. *Critical Care* 17: R7.
